# Supplementary material
Source: publisher site journal article supplement (https://www.dovepress.com/article/287415)
Supplement: Supplementary file 1 [file get_supplementary_file.php]

**Supplementary Information**

# Graphene oxide theranostic effect: conjugation of phothermal and photodynamic therapies based in an *in vivo* demonstration

**María Paulina Romero, Hilde Harb Buzzá, Mirian Denise Stringasci, Bianca Estevão, Cecília de Carvalho Castro e Silva, Marcelo A. Pereira-da-Silva, Natalia Mayumi Inada and Vanderlei Salvador Bagnato**


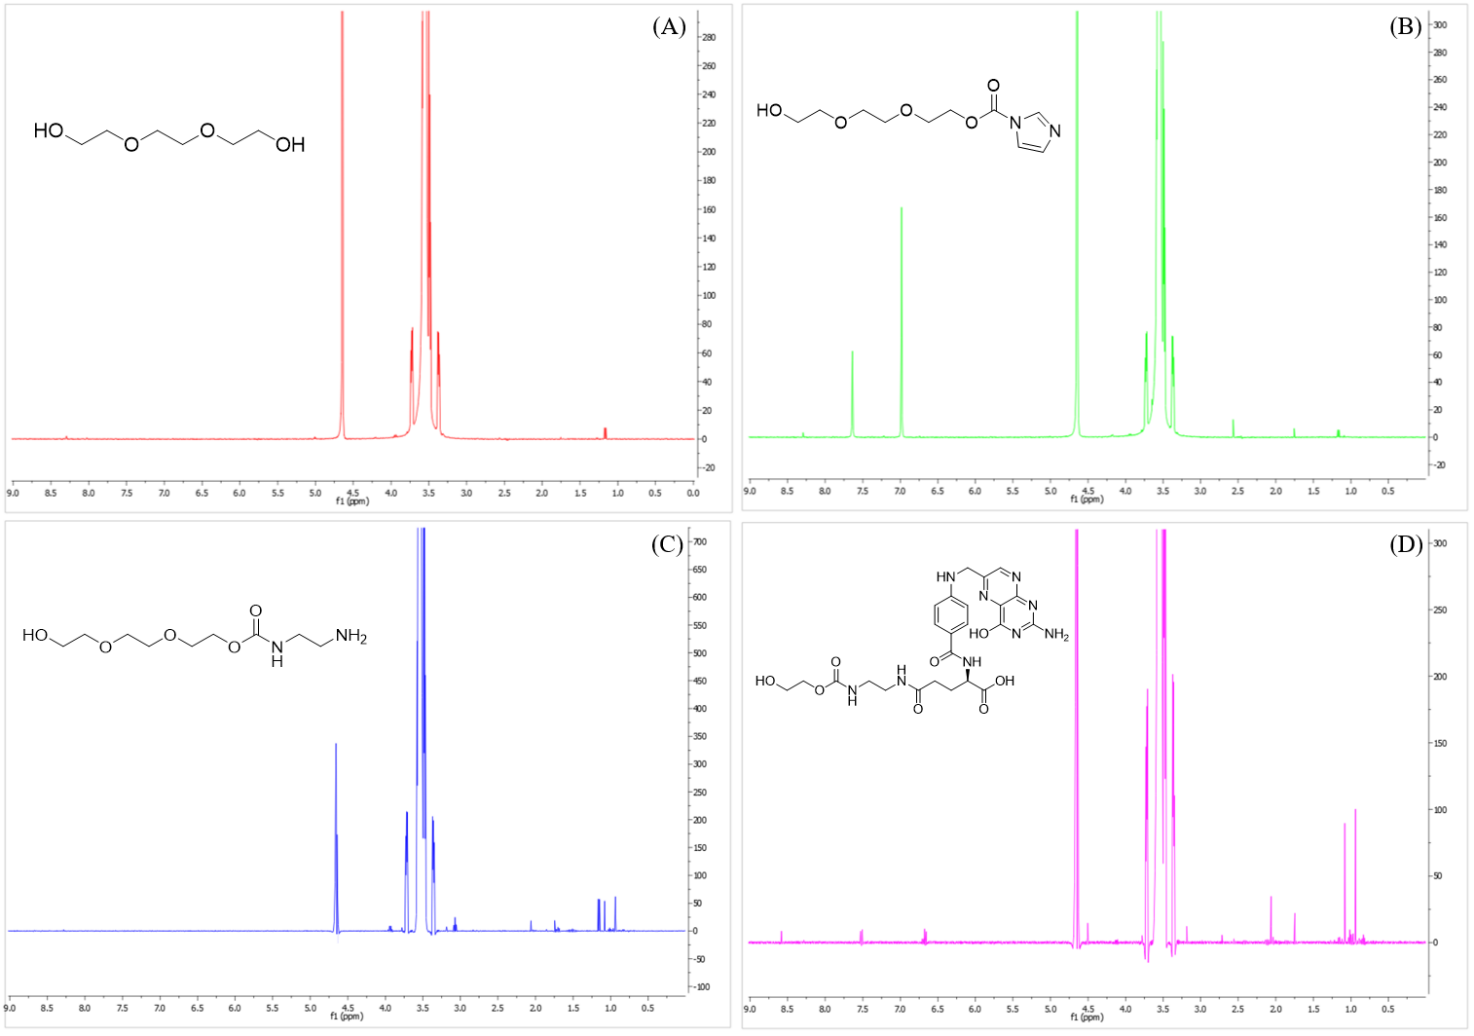


**Figure S1.** 1 H NMR Spectra of (A) PEG, (B) PEG-CDI, (C) PEG-NH2 and PEG-FA. All carried out with 600 μL of D2O.

**Figure S2.** FTIR spectra of PEG, PEG-CDI, PEG-NH2 and PEG-FA. All samples were run in KBr pellet.

**Figure S3.** FTIR spectra of GO, GO-RhodB, GO-PEGFA-RhodB and GO-PEGFA-IcG. All samples were run in KBr pellet and performed at the same concentration.

**Figure S4.** Hydrodynamic diameter obtained from DLS measurements.
